# Supplementary material
Source: PubMed Central journal article supplement (PMC6138243)
Supplement: NIHMS987444-supplement-Table_S1.pdf [file NIHMS987444-supplement-Table_S1.pdf]

**Supplemental Table S1: Taqman genotyping primers list**

| <b>Variants</b>   | <b>Primer Sequences</b>                                             | <b>Reporter1 Sequence</b> | <b>Reporter 1 Dye</b> | <b>Reporter2 Sequence</b> | <b>Reporter2 Dye</b> |
|-------------------|---------------------------------------------------------------------|---------------------------|-----------------------|---------------------------|----------------------|
| <b>rs75017182</b> | 5'-TCAGGTTGTCACCTTCTTTTACACAGT-3'<br>5'-CAGCATCAGCCACATATCTTTCCT-3' | TCAAAGGTGAGAATTT          | VIC                   | CAAAGCTGAGAATTT           | FAM                  |
| <b>rs3918290</b>  | 5'-TGCATATTGGTGTCAAAGTGTCAC-3'<br>5'-TCACCAACTTATGCCAATTCTTGT-3'    | TTCCAGACAACATAAGTG        | VIC                   | CCAGACAACGTAAGTG          | FAM                  |
| <b>rs55886062</b> | 5'-GAGGGCAAACCCCATCCA-3'<br>5'-TGGTCTTGCTAGCGCAACTC-3'              | AAGCTCTTCGAATCATTGA       | VIC                   | AAGCTCTTCGACTCATTGA       | FAM                  |
| <b>rs67376798</b> | 5'-AGGTCATGTAGCATTTACCACAGTT-3'<br>5'-TGAATTGAGCAACGTAGAGCAAGTT-3'  | ACATTTCTTCAACAATCAT       | VIC                   | CATTTCTTCATCAATCAT        | FAM                  |
