# Supplementary material
Source: PubMed Central journal article supplement (PMC6138243)
Supplement: NIHMS987444-supplement-Table_S2.pdf [file NIHMS987444-supplement-Table_S2.pdf]

**Supplementary Table S2: *DPYD* alternative splicing determination primers**

| Primers                | Sequences                                                     |
|------------------------|---------------------------------------------------------------|
| Ex9/10-Ex11            | 5'-GGCAGTAAAGCAGGAATGTGCG-3'<br>5'-TTTTACTATAACCTTCCGTGGGG-3' |
| Exon 10/11-1           | 5'-GGCAGTAAAGCAGGAATGTGCG-3'<br>5'-GCAAGTTCATCTCCTCAGGG-3'    |
| Exon 10/11-2           | 5'-CCCTGAGGAGATGGAATTGC-3'<br>5'-TTTTACTATAACCTTCCGTGGGG-3'   |
| CE1                    | 5'-GGCAGTAAAGCAGGAATGTGCG-3'<br>5'-TCAGGAAAGATATGTGGCTGATG-3' |
| CE2                    | 5'-CCTGAGGAGCATCAGCCACA-3'<br>5'-TTTTACTATAACCTTCCGTGGGG-3'   |
| <i>DPYD</i> (Exon 1-2) | IDT PrimeTime Assay Hs.PT.58.40113625                         |
| GAPDH house keeping    | 5'-ACCACAGTCCATGCCATCAC-3'<br>5'-TCCACCACCCTGTTGCTGT-3'       |
| PSMB2 house keeping    | 5'-TGA CTCTCAGTATCCTCGACC-3'<br>5'-AGGTTGGCAGATTCAGGATG-3'    |
| PSMB4 house keeping    | 5'-CATGGTCATCGGAGGCTATG-3'<br>5'-CTTCTCCAGAACTTCTCGCAG-3'     |
| RAB7A house keeping    | 5'-AGCTGACTTTCTGACCAAGG-3'<br>5'-CACATCAAATACCAGAACGCAG-3'    |
| REEP5 house keeping    | 5'-TCATCGCTCTTGGTGTCATC-3'<br>5'-TCATCTTCTTTGTTGGGACTCTC-3'   |
| VCP house keeping      | 5'-AGGCAGACAAACCCATCAG-3'<br>5'-GGCAAACATCTCATACTCCG-3'       |

*DPYD*, Dihydropyrimidine Dehydrogenase; GAPDH, Glyceraldehyde 3-phosphate dehydrogenase; PSMB2, Proteasome subunit beta-type 2; PSMB4, proteasome subunit beta-type 4; RAB7A, Ras-related protein Rab-7a; REEP5, Receptor Expression-Enhancing Protein 5; VCP, Valosin Containing Protein.
