# Supplementary material
Source: PubMed Central journal article supplement (PMC6138243)
Supplement: NIHMS987444-supplement-Table_S3.pdf [file NIHMS987444-supplement-Table_S3.pdf]

**Supplementary Table S3: Primers for the mini-gene reporter system construction**

| <b>Primer specification</b>                                        | <b>Sequences</b>                                          |
|--------------------------------------------------------------------|-----------------------------------------------------------|
| mCherry with 5' EcoRV site                                         | 5'-GATCGATATCATGGTGAGCAAGGGCGAG-3'                        |
| mCherry with 3' Ascl site                                          | 5'-GTACGGCGCGCCCCTTGACAGCTCGTCCATGC-3'                    |
| <i>DPYD</i> exon 10 with 5' Ascl site                              | 5'-CAAGGGGCGCGCCGGAATGTGCGCCTGTCAC-3'                     |
| <i>DPYD</i> intron 10 (first 500 bp) with 3' BamHI                 | 5'-GAGCGGATCCATTAGAGCACTTTAAAAATATACATGACACCC-3'          |
| <i>DPYD</i> intron 10 500 bp upstream of CE with 5' BamHI site     | 5'-TAATGGATCCGCTCTTACCACATGGCTCTG-3'                      |
| <i>DPYD</i> intron 10 500 bp downstream of CE with 3' PmeI site    | 5'-GTAGGTTTAAACTGTAAGTAACAGGACACAGCAGAA-3'                |
| <i>DPYD</i> intron 10 500 bp upstream of Exon 11 with 5' PmeI site | 5'-TACAGTTTAAACCTACAGAGTTTCTCTAGTCTTTTTCTCCTAC-3'         |
| <i>DPYD</i> exon 11 with 3' SgfI/AsiSI site                        | 5'-CCATGCGATCGCCTTTAGGATCACTCAGAACTGAACC-3'               |
| AcGFP1 with 5' SgfI/AsiSI site                                     | 5'-GATCGCGATCGCATGGTGAGCAAGGGCG-3'                        |
| AcGFP1 with 3' NotI site                                           | 5'-CTATGCGGCCGCTTGACAGCTCATCCATGCC-3'                     |
| <i>DPYD</i> exon 13 with 5' Ascl site                              | 5'-CAAGGGGCGCGCCTCACAATATGGAGCTTCCGT3'0                   |
| <i>DPYD</i> first 500 bp of intron 13 with 3' BamHI site           | 5'-CCATGGATCCAAGTACAAAGTCATAATGTTAAATGAAACTC-3'           |
| <i>DPYD</i> last 500 bp of intron 13 with 5' BamHI site            | 5'-ACTTGGATCCATGGTTGATGAGCCAGTAAT-3'                      |
| <i>DPYD</i> first 500 bp of intron 14 with 3' PmeI site            | 5'-AGTGGTTTAAACTTCTTTAAGAGAAAAAAGATTTTATAA-3'             |
| <i>DPYD</i> last 500 bp of intron 14 with 5' PmeI site             | 5'-AGAAGTTTAAACCACTATGAATATTTAAGATATTATTATGTGTACTATAGT-3' |
| <i>DPYD</i> exon 15 with 3' SgfI/AsiSI site                        | 5'-CCATGCGATCGCCCTCAGACTTCTTGGAAG-3'                      |
